# Supplementary material for: Ionotropic Crustacean Olfactory Receptors
Source: PLoS One. 2013 Apr 3;8(4):e60551. doi: 10.1371/journal.pone.0060551 (PMC3615998; doi:10.1371/journal.pone.0060551)
Supplement: Figure S1 — Alignment of predicted amino acid sequences for spiny lobster and Drosophila IR25a and IR8a. Geneious software, version 5.6.6 created by Biomatters (Available from http://www.geneious.com/) was used to trim low-quality sequence end reads, create consensus gene sequences, translate putative protein sequences, and align sequences (using the Geneious ClustalW plug-in). (PDF) [file pone.0060551.s001.pdf]

|           | 1                                                               | 10 | 20 | 30 | 40 | 50 | 60 |
|-----------|-----------------------------------------------------------------|----|----|----|----|----|----|
|           |                                                                 |    |    |    |    |    |    |
| DmelIR25a | -MG--SRLDWGVADVALWAIADQIDYHQVFINEVDNEPAAKAVEVVLTLYLKKNIRYGLSV   |    |    |    |    |    |    |
| PargIR25a | MVGGAQLLQFLYLTATLLVGAFQKVNI FVLHDEGNVQAQQGIMAAIKFLENSADGVTVG    |    |    |    |    |    |    |
| DmelIR8a  | -----MELPLLVL LLLALRFAGSEVLKITFWIEPVQRAEFDTDIAMVLKELDALR-----   |    |    |    |    |    |    |
| PargIR8a  | MEGTTMLAPLCLCLLLLPAAVAKLTIVSALDES LQEGVAWLEEAVSRAQRSTN-----     |    |    |    |    |    |    |
| DmelIR25a | QLDSIEANK-SDAKV LLEAICNKYATSIEKKQTPHLILD TTKSGIAS ETVKSFTQALGLP |    |    |    |    |    |    |
| PargIR25a | RQDMMTMKKGDDIEATVNATCDMMDAAIQENEP PHIVLDATNTGMISETVKSFTKALALP   |    |    |    |    |    |    |
| DmelIR8a  | -----LDVKVDDTTLT LTRSEDGLDMQRFC EILSTVVGAS                      |    |    |    |    |    |    |
| PargIR8a  | -----FTLRQEVVKV SIDNEEDGK--QTICSAALNKGAG                        |    |    |    |    |    |    |
| DmelIR25a | TISASYGQQGDLRQWRDLDEAKQKYLLQVMPPADI IPEAIRSIVIHMNITNAAILYDDSF   |    |    |    |    |    |    |
| PargIR25a | TFAASYGQEGDIREWRDLTEEGEKVLVQLMPPGDI I VQAIRDIVRTQNITNAGI IYDDTF |    |    |    |    |    |    |
| DmelIR8a  | AVIDLT--YSHWEEGYNLVRS LGIGYVRLERIMRPFLDMFGDFMRQKRANNVAMVFMNAR   |    |    |    |    |    |    |
| PargIR8a  | LVVDVT--AGGWTYARETAADQDTPYLRVQISNYQWMAATDQLLQNRNATDAALIFASEA    |    |    |    |    |    |    |
| DmelIR25a | VMDHKYKSLLQNIQTRHVITAIKDGKREREEQIEKL RNL DINNFFILGTLQSIRMVLES   |    |    |    |    |    |    |
| PargIR25a | VMEHKYKSLLQNLPCRHI LDMWEAR-EMDLRKQMKRLQDADIVNYFAVGSRDTISRILDA   |    |    |    |    |    |    |
| DmelIR8a  | DAVEAMQQMLVGYPPFRTLIMDASQTDPGQHFLERIRSLRPAPTYIALFARAAAMNGIFEK   |    |    |    |    |    |    |
| PargIR8a  | ELDQALYYLVEGSVVRVIVISGIDAT----LTHTLKKMRPSPSYVILGATDELNTLFSK     |    |    |    |    |    |    |
| DmelIR25a | VKP-AYFERNFAWHAITQNEGEISSQRDNATIMFMKPMAYTQYRDR LGLLRTTYNLNEEP   |    |    |    |    |    |    |
| PargIR25a | ATANDLFGRKYAWYAVSKDNEDIQCGCENASVVFLRPQPNADTRGR LNM LQRDFQLTATP  |    |    |    |    |    |    |
| DmelIR8a  | VQKADLFQRPLEWHFVFLDTRDRVFKYRRQAE LCTRFTLNP-RAICRSMMPDLYCGSG-    |    |    |    |    |    |    |
| PargIR8a  | AVRNNLVTRDSRWTLVATDHKSDEFDRDMLTESTGVTLMTPAQEVCCTVRNRNTNCDCDT    |    |    |    |    |    |    |
| DmelIR25a | QLSSAFYFDLALRSFLT IKEMLQSGAWPKDMEY LNCDDFQGGNTPQRNL DLRDYFTKITE |    |    |    |    |    |    |
| PargIR25a | EIDSAFYFDYTIRGIKAAAKMATEGKY-DNFKYVRCEE FDEQDPP-----VRENFDLRSA   |    |    |    |    |    |    |
| DmelIR8a  | FTMQRAMLLNLVRLSLINAAQVSPGYPLAIYQDCNATASSEVSDP-----LEKDDYNWLD    |    |    |    |    |    |    |
| PargIR8a  | LMIPRELTVNAMLMLARVLKAND--QQNGGGDGGDQPSTTSFYSA-----LRTELNSWQN    |    |    |    |    |    |    |
| DmelIR25a | PTSYGTFDLVTQSTQPFNGHSFMKFEMDINVLQIRGGSSVNSK SIGK WISGLNSELIVKD  |    |    |    |    |    |    |
| PargIR25a | LKSVSVDWTWAPISWGGNGNTFLDIPLTMDKFMVLQGR TAERKALGEWDSGMPGTLMFKS   |    |    |    |    |    |    |
| DmelIR8a  | MVHWSNFLAYAPPLPHIQDQFQSPVPGLTFAVNISAGYYSSEHEAKTDLAAWSSVGEMRL    |    |    |    |    |    |    |
| PargIR8a  | MKWEQDTLQMVP-----QFMFDITA----INSTDTSAVGSWTTADKLRL               |    |    |    |    |    |    |
| DmelIR25a | EEQMKNLTADTVYRIFTV VQAPFIMR-----DETAPKGYKGYCIDLINEIAAI          |    |    |    |    |    |    |
| PargIR25a | GMSLVDFQAVTVYRITTVQQSPFIYKRT-----NEDGEVEYYGYCIDLINEIKEI         |    |    |    |    |    |    |
| DmelIR8a  | LNETIS-PARRFFRIGTAESIPWSYL RREETGELIRDRSGLP-IWEGYCIDFIIRLSQK    |    |    |    |    |    |    |
| PargIR8a  | NPEYEHSPIRRFFKIGTIMARPWVSPIS--GSSVRKKPTSSNPDDYMGYCVELAARLAEK    |    |    |    |    |    |    |
| DmelIR25a | VHFDYTIQEVEDGKFGNMDENGQWNGIVKKLMDKQADIGLG SMSVMAEREIVIDFTVPYY   |    |    |    |    |    |    |
| PargIR25a | VDFEYELFEAPDGKFGTMND DMEWNGMIKQLIDKQADIALAPLSVMAERENVVDFTVPYY   |    |    |    |    |    |    |
| DmelIR8a  | LNFEFEIVAPEVGHMGELNELGEWDGVVGD LVRGETDFAIAALKMYSEREEVIDFLPPYY   |    |    |    |    |    |    |
| PargIR8a  | MKFDFEFKFPSPDQGYGARQKNGSWNGLVGDLSNGVTDLIVAPL TMTS EREEVIDFVAPYF |    |    |    |    |    |    |
| DmelIR25a | DLVGITIMMQRPSSPSSLFKFLT VLETNVWLCILAAYFFTSFLMWIFDRWSPYSYQNNRE   |    |    |    |    |    |    |
| PargIR25a | DLVGITILMKKPKVPTS LFKFLT VLEPEVWICILFAYAFTSVLLWIFDRFSPYSYQNNKE  |    |    |    |    |    |    |
| DmelIR8a  | EQTGISIAIRKPVRRTSLFKFMTVLRLEVWLSIVAALVGTAIMIWFMDKYSPYSSRNNRQ    |    |    |    |    |    |    |
| PargIR8a  | DQSGISIAMRKRQREESLFKFMTV LKAEVWVSIVAALVVTGIMIWL LDRYSPYSAQNNAD  |    |    |    |    |    |    |
| DmelIR25a | KYKDDEEKREFNLKECLWFCMTSLTPQGGGEAPKNLSGRLVAATWWLFGFII IASYTANL   |    |    |    |    |    |    |
| PargIR25a | RYKDDDEKREFTFKECLWFCMTSLTPQGGGEAPKNLSGRLVAATWWLFGFII IASYTANL   |    |    |    |    |    |    |
| DmelIR8a  | AYP--YACREFTLRESFWFALT SFTPQGGGEAPKAISGRMLVAA YWLFVVLMLATFTANL  |    |    |    |    |    |    |
| PargIR8a  | LYP--PHCRKFTLKESFWFALT SFTPQGGGEAPKALSGRTLVAAYWLFVVLMLATFTANL   |    |    |    |    |    |    |
| DmelIR25a | AAFLTVSRLDTPVESLDDLAKQYKILYAPLNGSSAMTYFERMSNIEQM FYEIWKDLSLND   |    |    |    |    |    |    |
| PargIR25a | AAFLTVSRLDTPIESLDDL SNQYKVQYAPMNGSSTMTYFERMAYIEKKFYEIWKDMSLND   |    |    |    |    |    |    |
| DmelIR8a  | AAFLTVERMQTPVQSLEQLARQSRINYTVVKDS DTHQYFVNMKFAEDTLYRMWKELALNA   |    |    |    |    |    |    |
| PargIR8a  | AAFLTVERMQTPVSSLDEL AGQSKIN YTVLQSTATYQYFFNMAAAEEELYRVWKELTLNS  |    |    |    |    |    |    |
| DmelIR25a | SLTAVERSKLAVWDYPVSDKYTKMWQAMQEAKLPATLDEAVARVN STAAT-GFAFLGDA    |    |    |    |    |    |    |
| PargIR25a | SMSDVERAKLAVWDYPVSDKYTKMWQSMQEAGLPQTFESALERVRKSTSSSEGFA YLGDA   |    |    |    |    |    |    |
| DmelIR8a  | SK---DFKKFRIWDYPIKEQYGHILLAINSSQPVADAKEGFANVDAHENAD--YAFIHDS    |    |    |    |    |    |    |
| PargIR8a  | TS---DQSKYRVWDYPVKEQYTHILQVIEESGPVDTAEVGFQRVLDNANGE--FAFIHDA    |    |    |    |    |    |    |
| DmelIR25a | TDIRYLQLTNCDLQVVGEEFSRKPYAIAVQQGSHLKDQFNNAI LTLNKRQLEKLKEKWW    |    |    |    |    |    |    |
| PargIR25a | TDIRYQVLTNCDLQIVGEEFSRKPYAIAVQQGSPLKDQFNDAILKLLNQRKLET LKERWW   |    | </ |    |    |    |    |
