# Supplementary material for: Ionotropic Crustacean Olfactory Receptors
Source: PubMed Central journal article supplement (PMC3615998; doi:10.1371/journal.pone.0060551), 2013-04-03
Supplement: pone.0060551.s002.pdf [file pone.0060551.s002.pdf]

## Supplementary Figure 2

PargIR25a GMIKQLIDKQADIALAPLSVMAERRENVVDFTVPYYDLVGITILMK  
PargIR8a GLVGDLSNGVTDLIVAPLTMSEREEVIDFVAPYFDQSGISIAMR  
PargIR93a GMVKMVS DGEVLIGVAAFSVSDQRMKAVNFTTTIDRQPYAFMIAR  
GMVGMVGRKESDMGVGPFSLTAVRAEMVDYMGLVVDALKIIGGL  
GIVGDLLDGSADLSFAPLSVTAQRAKHLDFSDPYFFFSSMSILS  
RPTSEWRPSTITLARREEAIDFTFPYY  
GMIGQVARHEAHAAICEITITYMRETVVDFSYPYLESSTLVS  
GLMGQIQRHEVDIGLANLFISSHNLQVPDLTSPYRTE  
IGLANLFNTKHWTQVIDLTAPYRTE  
GLMGQLHRREIDIGLNAFALSIQWMEVPDLTASYTAE  
GLCGQLQRNEVDIGLACFYTSSHWLDAVELTAPYATE  
QLHRNEVDIGLANLFVSNHWLGAADLTTPYTVE  
GMVGMVGRKEVDLGLGPFVGSATRAEVVDFTRSVLIDTLRIMGGV  
GMVGMLLRDEAVIGLG  
GMVGQVARHEAHAAFCMITISRNRETVVDFTLPLL  
GMVGQLERNEVDIGVANLYVSSFQTEVLDFTAAYTSE  
LANLYISYSQKNIEFSAPYSFE  
GMVGTLTEQRADVSMMLFWSFARKQVIDFTRIYT  
GIIGALQHQQADFSLNIDLTSTRIHVVDYSTLYT  
GTVGVLQHQQADFSMILTLPTRKHVLQYSIIYN  
GMMGELQREETDFCMIAAPTPERLHATEYSRGY  
MVGQLQREESDLCTAVGPT  
FGLDLDLTPTRIHVLDYSIIYA  
GIVGMLQHQQADLGLNLDLTPTRIHVLDYSIVYK  
GTLQHQADFSLVLSPTSGRDE  
LNLTPARTQVIEYSIVY  
QRADFGLNLDLTPARIHVLDYSVLY  
GIIGALQHQQADFSLNIDLTSTRIHVVDYSTLYT  
GLQHQQADIGLDDLTPKRIHILDYSVLYA  
GTVGALQHQQADFSMLLTLPTRLRVVQFSTILY  
GIVGTLQHHLADFSLNLDLTPTRKQVLDYSILL  
GIVGTLQHKKADFSNLTPSPARMKVITHTRIYS  
LQHEEADFSNLTPSPARMEVITHSIIYS  
GMIGMVHRKEVEFAIGPFLVTPDRSMVSDFSEPVYVDNQALV  
VMKEVADFATGPLSMTPARGEVVDFCWPVWADNLRILGA  
GMIGMVSREEVDIGVGPFTLSATRAQVVDFTWPILVDHFRMLGA  
TSRAQVVDFTGPILTEYWRVLGA  
GMIGMVHRKEVEFAIGPFLVTPDRSMVSDFSEPVYVDN  
LGWGPFAYSAARSKVIDYTRPMLIDYIRIMGG  
GMVGMVGRRDADIGLGPFDVTAERA  
ADIGLGPLSLSAERA  
GMVGQVARHEAHAAFCMITISRNRETVVDFTLPLL  
GMLGQLQRKEAEISMGPFVMTQERVTV  
EIVLGPSSVSYQREAICDFSDPIVTDDFAIL  
GIVGMLQHQQADLGLNLDLTPTRIHVLDYSIVY  
EEVDIGLGPFSIRTFRMEMVDYTREIMFD
